# Supplementary material for: Effects of early-life penicillin exposure on the gut microbiome and frontal cortex and amygdala gene expression
Source: PubMed Central journal article supplement — iScience. 2021 Jul 15;24(7):102797. doi: 10.1016/j.isci.2021.102797 (PMC8324854; doi:10.1016/j.isci.2021.102797), 2021-07-15
Supplement: mmc1.pdf [file mmc1.pdf]

iScience, Volume 24

## **Supplemental information**

### **Effects of early-life penicillin exposure on the gut microbiome and frontal cortex and amygdala gene expression**

**Angelina Volkova, Kelly Ruggles, Anjelique Schulfer, Zhan Gao, Stephen D. Ginsberg, and Martin J. Blaser**

# Supplemental Figures

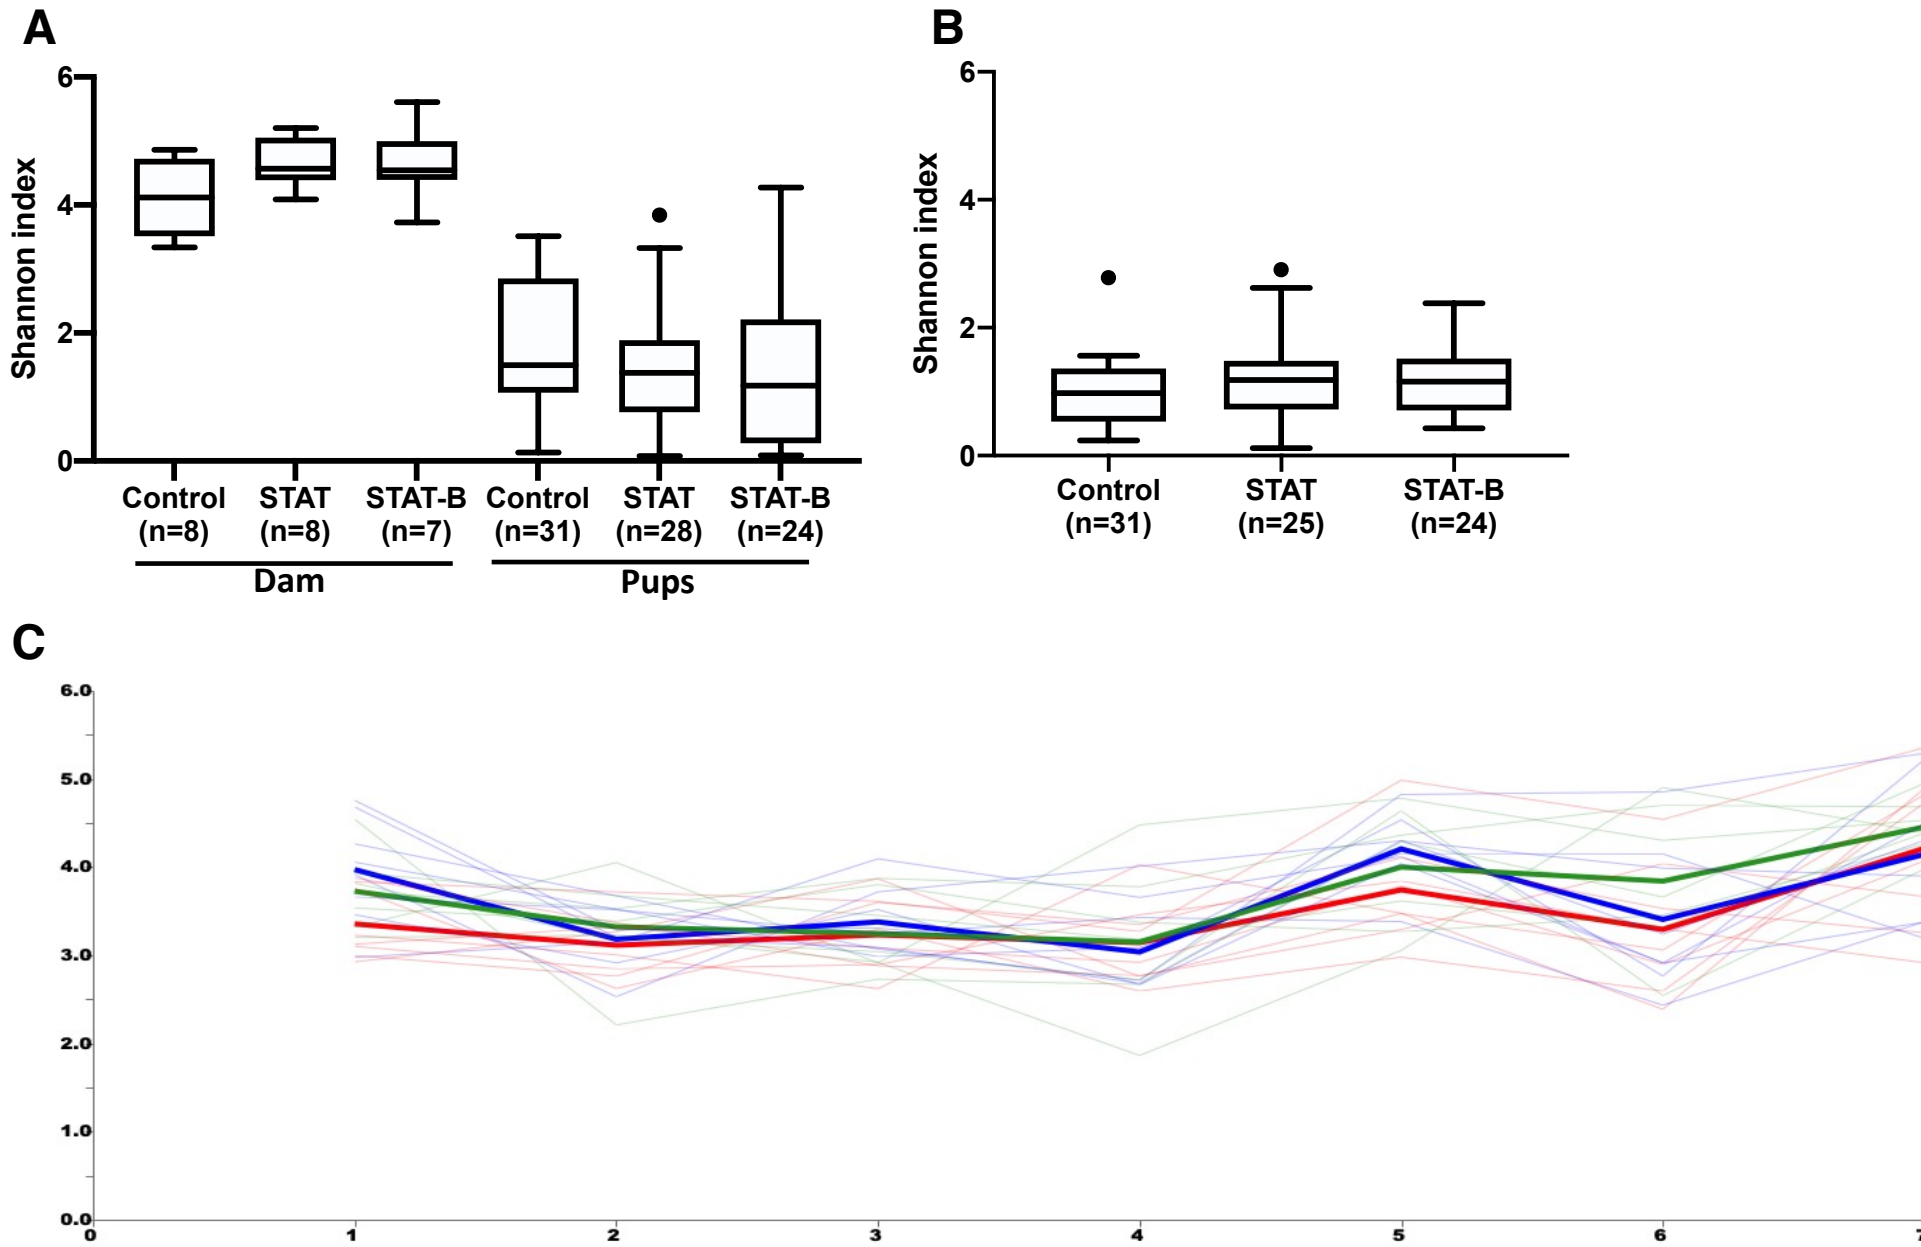

**Figure S1.** Alpha diversity, represented by Shannon index, with reference to STAR Methods.

**Figure S1. Alpha diversity, represented by Shannon index, with reference to STAR Methods. Panels: A.** Cecal content from dams and pups; **B.** Small intestinal content from pups. No significant differences were found between different treatment groups by Kruskal-Wallis test ( $p > 0.05$ ); **C.** Volatility of Shannon index in fecal samples from dams. Colors are: control (Red), STAT (blue), STAT-Birth (green). Time points indicate: 1. Start of whittening; 2. End of mating; 3. Post-mating 1; 4. Pregnancy check; 5. Post-mating 2; 6. Pup observation; 7. Sacrifice. No significant differences were found among the three treatment groups at the different timepoints by one-way ANOVA test ( $p > 0.05$ ).

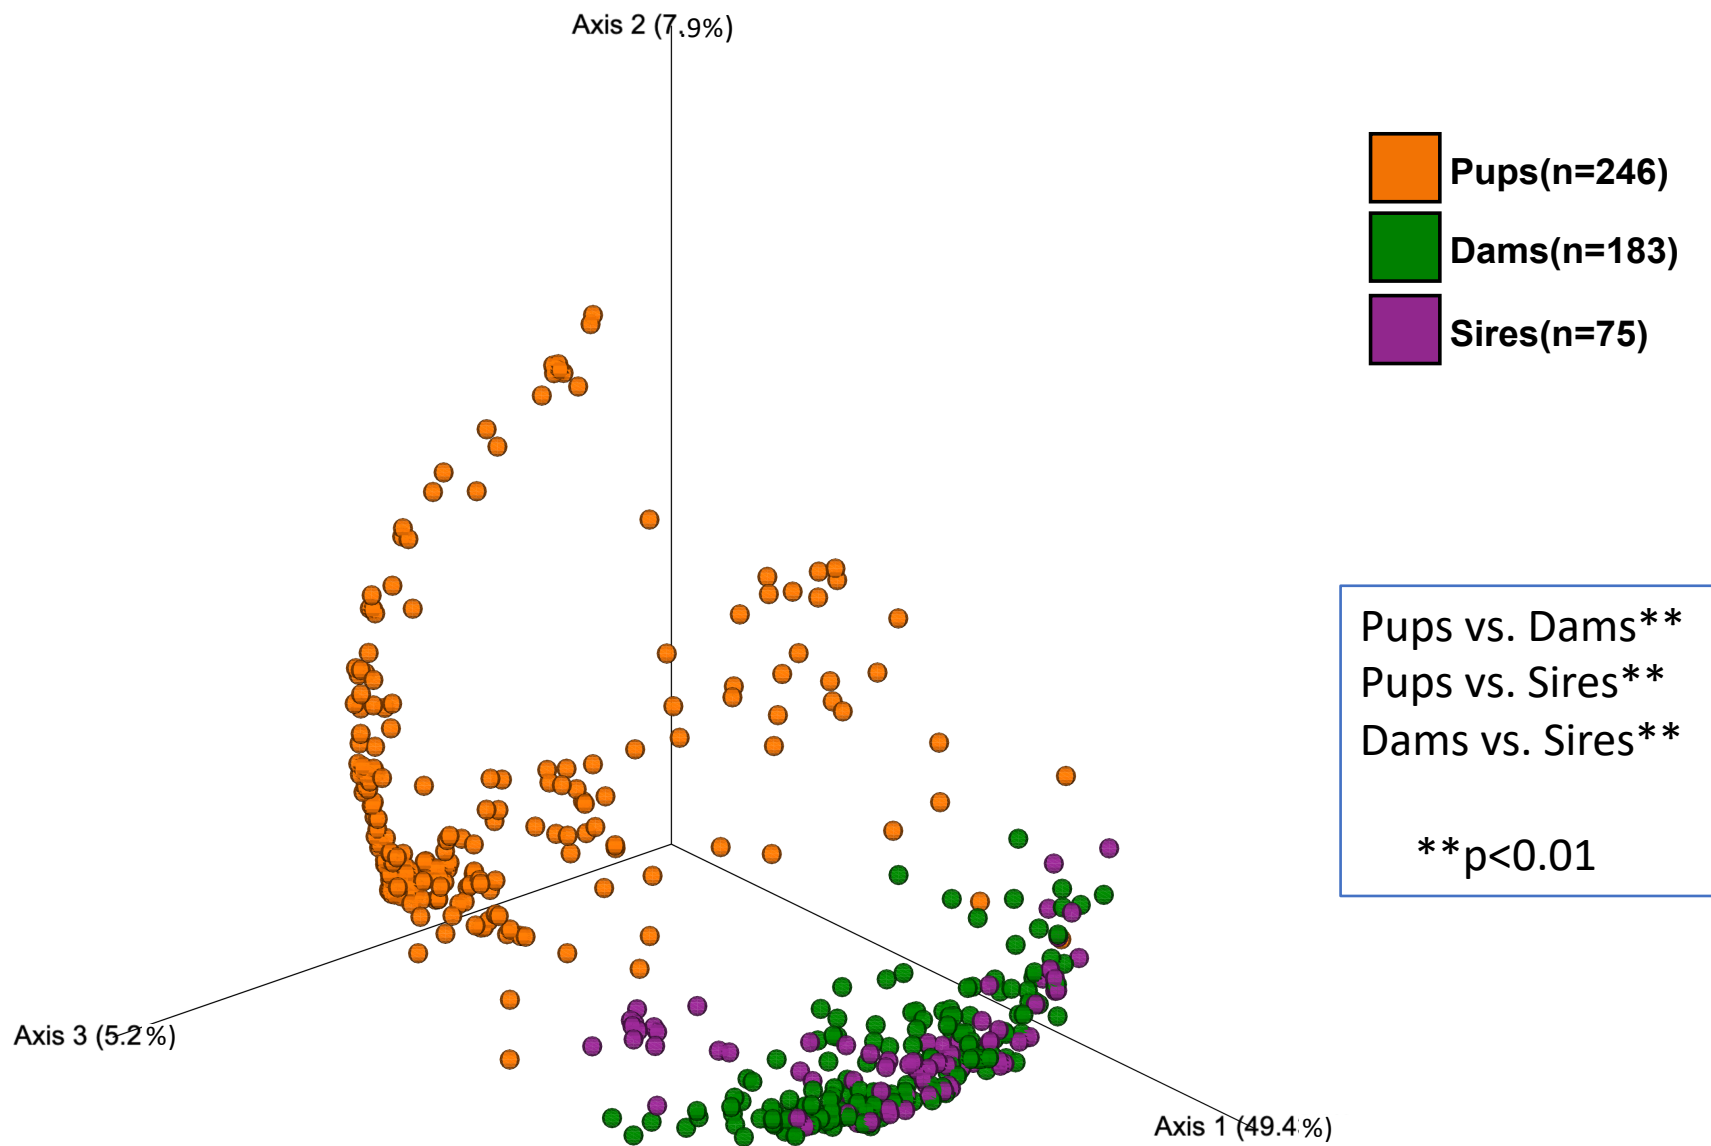

**Figure S2.** Beta-diversity of pup, mother, and sire, according to Bray-Curtis distance matrix analysis of 504 samples, as shown by PCoA, with reference to STAR Methods.

**Figure S2. Beta-diversity of pup, mother, and sire, according to Bray-Curtis distance matrix analysis of 504 samples, as shown by PCoA, with reference to STAR Methods. All three groups differ significantly in composition, as determined by Pairwise Permanova test (\*\*p < 0.01).**

**Figure S3.** PCA based on relative expression of all genes in the frontal cortex and amygdala in the two-group comparison, in relation to Figure 4.

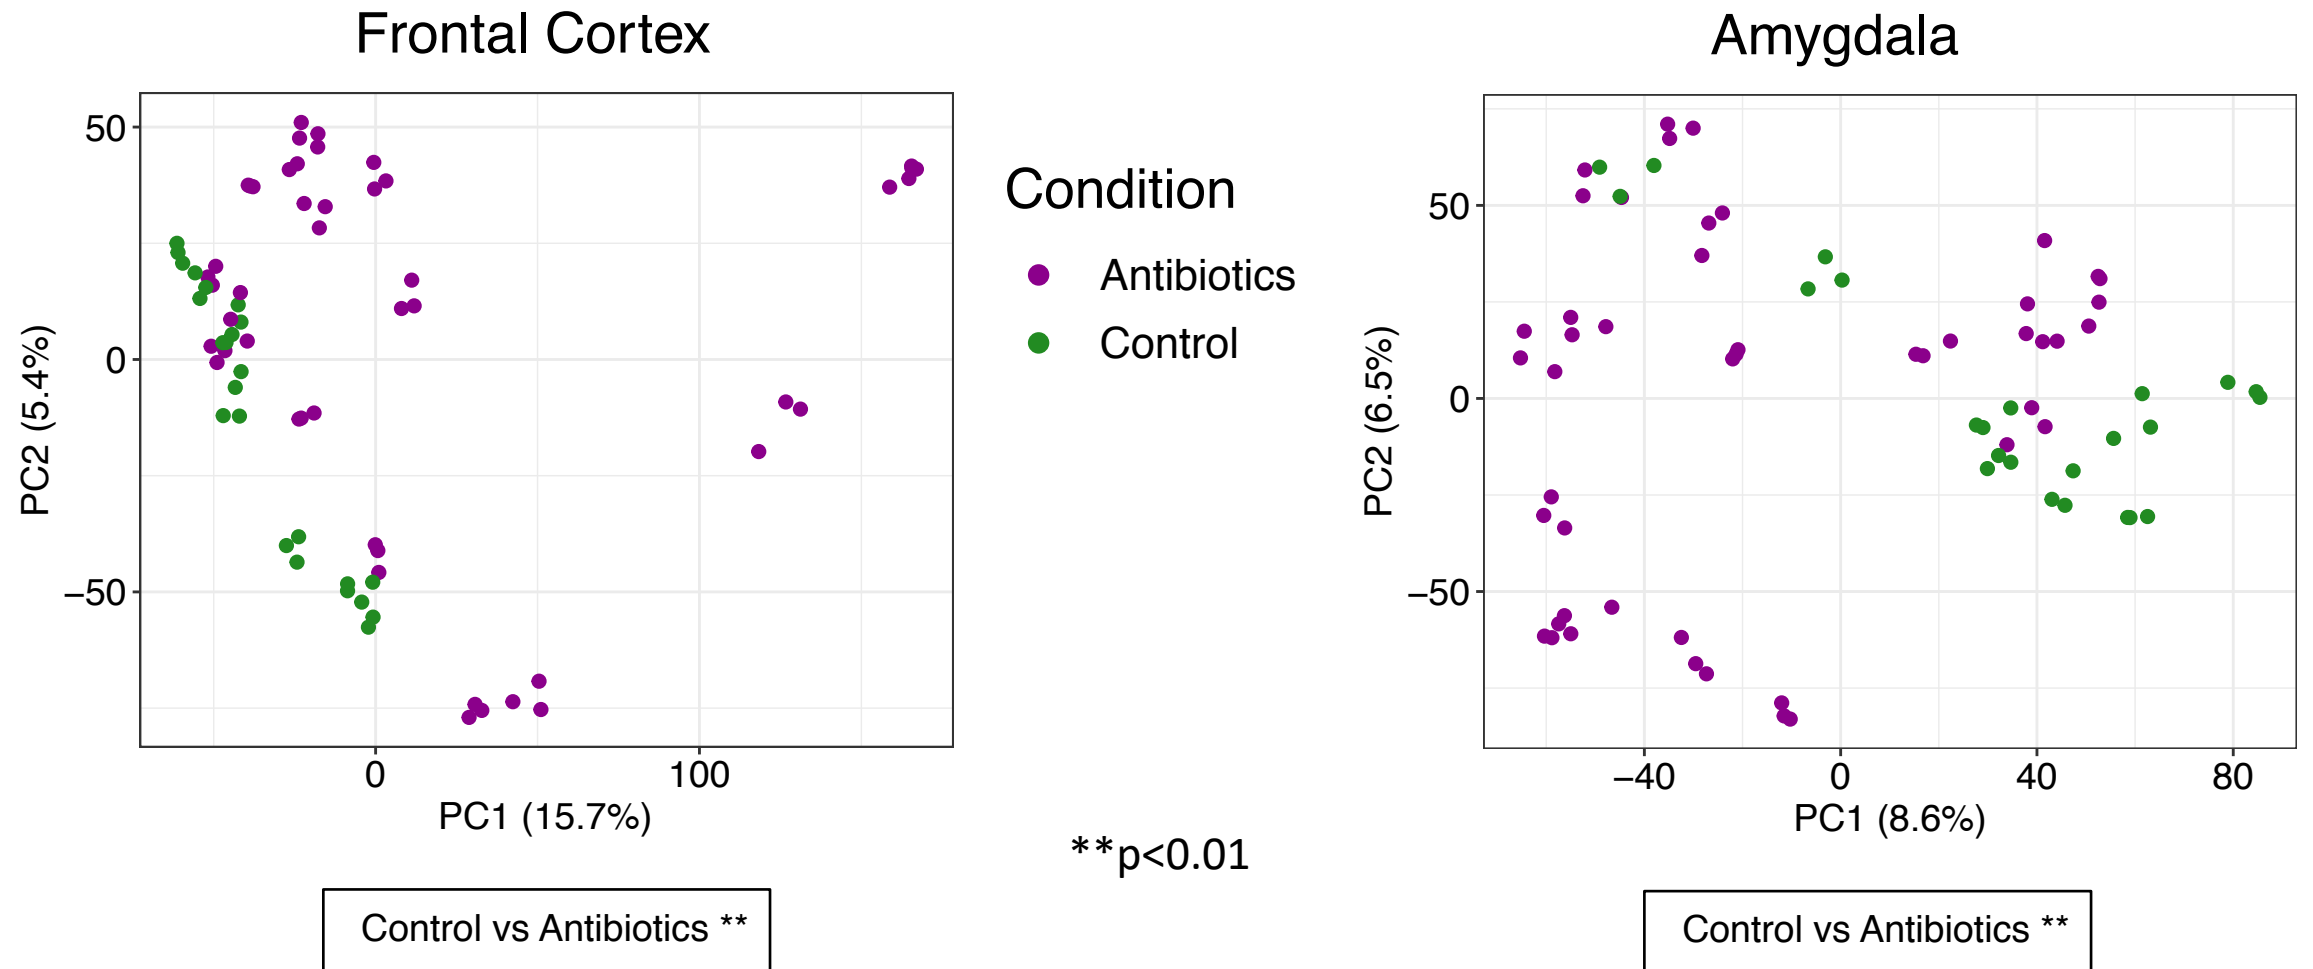

**Figure S3. PCA based on relative expression of all genes in the frontal cortex and amygdala in the two-group comparison, in relation to Figure 4.** Comparisons are between the control mice and the mice in the two antibiotic exposure groups (STAT and STAT-Birth) combined into a single group. Global expression data for each mouse in each anatomic site are represented by PCA. The significance of differences was tested by pairwise Wann-Whitney test based on PC1 (\*\*p<0.01).



## Frontal Cortex

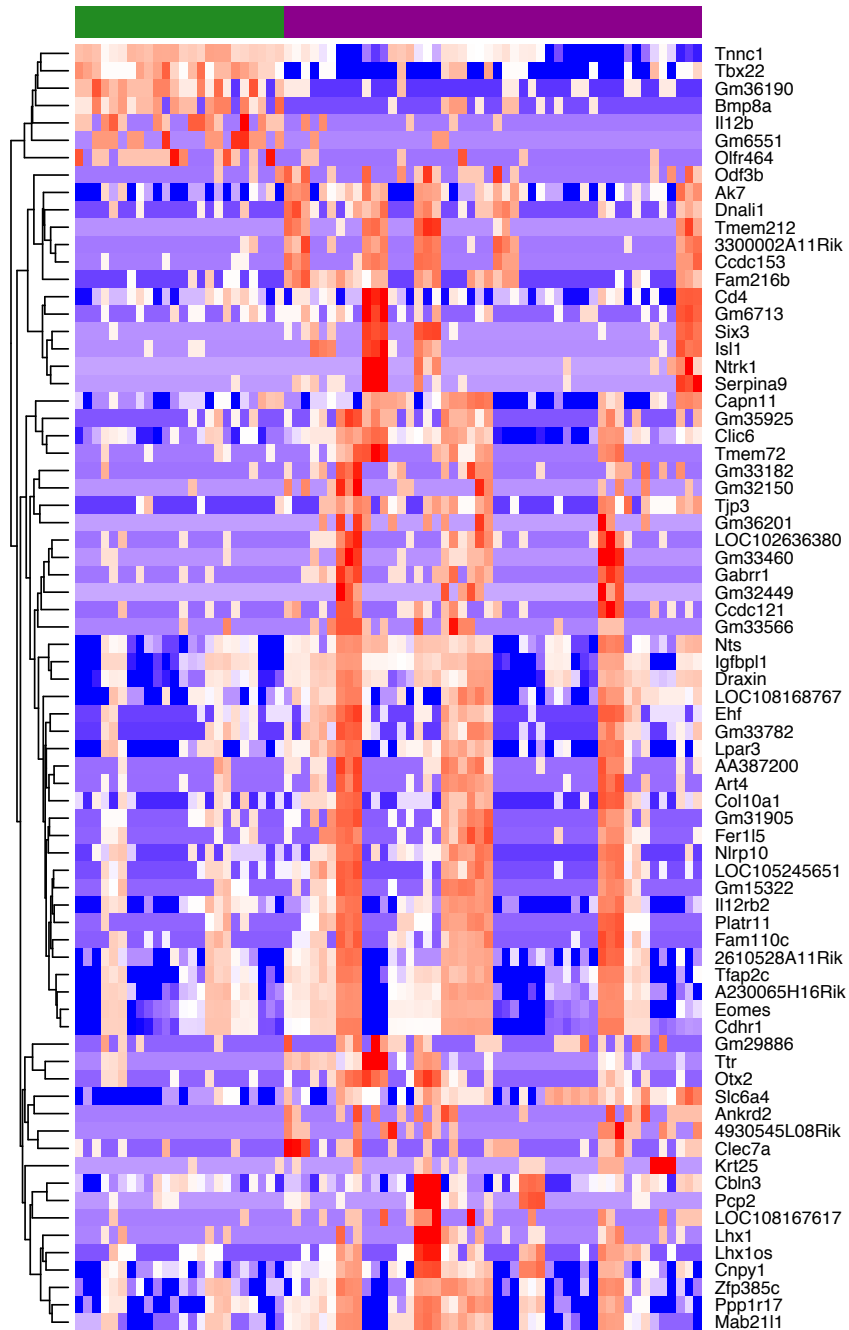

## Amygdala

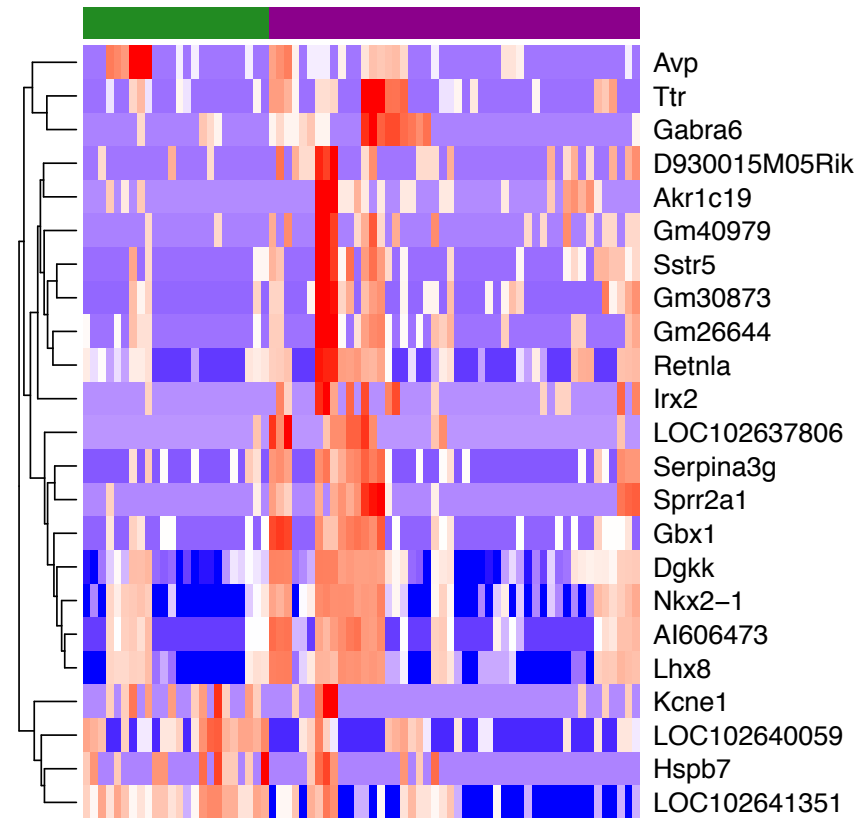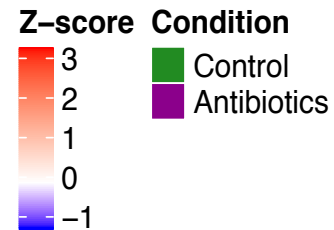

**Figure S4.** Heat map of genes in the frontal cortex and amygdala that are differentially expressed in the two-group comparison (combining the STAT and the STAT-Birth groups) compared to controls, in relation to Figure 6.

**Figure S4. Heat map of genes in the frontal cortex and amygdala that are differentially expressed in the two-group comparison (combining the STAT and the STAT-Birth groups) compared to controls, in relation to Figure 6. Only genes that are significantly significant ( $p < 0.01$  with log fold-change  $> 1.5$ ) are shown.**
